# Supplementary material for: Breaching the Bridge: An Investigation into Doctor‐Patient Miscommunication as a Significant Factor in the Violence against Healthcare Workers in Palestine
Source: Hindawi journal article supplement (doi:10.1155/2021/9994872), 2021-01-01
Supplement: f1 [file 9994872.f1.zip]

| Sex    | Age groups         | Level of education | Place of residence |
|--------|--------------------|--------------------|--------------------|
| Male   | less than 40 years | Graduate studies   | City               |
| Male   | less than 40 years | Graduate studies   | Village            |
| Female | less than 40 years | Graduate studies   | Village            |
| Male   | less than 30 years | Tawjihi or less    | Village            |
| Male   | less than 30 years | Bachelor degree    | Village            |
| Male   | less than 30 years | Bachelor degree    | Village            |
| Female | less than 40 years | Bachelor degree    | Village            |
| Female | less than 40 years | Bachelor degree    | Village            |
| Female | less than 50 years | Graduate studies   | City               |
| Male   | less than 40 years | Graduate studies   | City               |
| Female | less than 40 years | Bachelor degree    | Village            |
| Female | less than 30 years | Bachelor degree    | Village            |
| Male   | less than 40 years | Bachelor degree    | Village            |
| Male   | less than 50 years | Diploma            | Camp               |
| Male   | less than 60 years | Bachelor degree    | City               |
| Male   | less than 40 years | Bachelor degree    | City               |
| Male   | less than 60 years | Graduate studies   | Camp               |
| Female | less than 50 years | Graduate studies   | Village            |
| Female | less than 40 years | Graduate studies   | City               |
| Male   | less than 60 years | Bachelor degree    | Camp               |
| Male   | less than 40 years | Bachelor degree    | Village            |
| Male   | less than 40 years | Bachelor degree    | Village            |
| Male   | less than 30 years | Bachelor degree    | City               |
| Male   | less than 40 years | Bachelor degree    | City               |
| Male   | less than 60 years | Graduate studies   | Village            |
| Female | less than 30 years | Bachelor degree    | Village            |
| Female | less than 40 years | Graduate studies   | City               |
| Male   | less than 40 years | Graduate studies   | Village            |
| Female | less than 30 years | Bachelor degree    | Village            |
| Female | less than 30 years | Diploma            | Camp               |

One of the reasons for violence, physical or  
Agree  
Agree  
Strongly agree  
Agree  
Agree  
Strongly agree  
Strongly agree  
Agree  
Strongly agree  
Disagree  
Agree  
Agree  
I do not know  
Strongly disagree  
Disagree  
Agree  
Agree  
Agree  
Agree  
Agree  
I do not know  
I do not know  
Agree  
Agree  
Strongly agree  
Agree  
Strongly agree  
Agree  
Strongly agree  
Agree  
I do not know  
Strongly disagree  
Agree  
Agree  
Agree

Agree  
Agree  
Strongly agree  
Strongly agree  
Strongly agree  
Strongly agree  
Strongly agree  
Disagree  
Strongly disagree  
Disagree  
Agree  
Strongly disagree  
Agree  
Agree  
Agree  
Agree  
I do not know  
I do not know  
Strongly agree  
Strongly agree  
Strongly agree  
Agree  
Strongly agree  
Agree  
Agree  
Strongly disagree  
I do not know  
Strongly agree  
I do not know

One of the reasons for violence, physical or  
Agree  
Strongly agree  
Strongly agree  
Strongly agree  
Disagree  
Strongly agree  
Strongly agree  
Strongly agree  
Agree  
Disagree  
Agree  
Agree  
Agree  
Agree  
Disagree  
Agree  
Agree  
Disagree  
Agree  
Strongly agree  
Agree  
Strongly agree  
Agree  
Agree  
Disagree  
Disagree  
Agree  
Agree  
Strongly disagree

One of the reasons for violence, physical or  
Strongly agree  
Strongly agree  
Strongly agree  
Strongly agree  
Agree  
Strongly agree  
Agree  
Agree  
Strongly agree  
Agree  
Agree  
Strongly agree  
Agree  
Disagree  
Agree  
Agree  
Agree  
Disagree  
Strongly agree  
Agree  
Strongly agree  
Agree  
Strongly agree  
Agree  
Disagree  
I do not know  
I do not know  
Strongly agree  
Strongly disagree

|                       |                             |                             |                             |
|-----------------------|-----------------------------|-----------------------------|-----------------------------|
| violence, physical or | One of the reasons for viol | One of the reasons for viol | One of the reasons for viol |
| Disagree              | Agree                       | Strongly agree              | Strongly agree              |
| Agree                 | Strongly agree              | Agree                       | Agree                       |
| Agree                 | Strongly agree              | Strongly agree              | Strongly agree              |
| Strongly agree        | Strongly agree              | Strongly agree              | Strongly agree              |
| I do not know         | Agree                       | Strongly agree              | Agree                       |
| Disagree              | Agree                       | Strongly agree              | Strongly agree              |
| Agree                 | Strongly agree              | Strongly agree              | Agree                       |
| Disagree              | Strongly agree              | Strongly agree              | Strongly agree              |
| I do not know         | Strongly agree              | Strongly agree              | Strongly agree              |
| Disagree              | Strongly agree              | Strongly agree              | Strongly agree              |
| Disagree              | Strongly agree              | Strongly disagree           | Disagree                    |
| Agree                 | Agree                       | Agree                       | Agree                       |
| Agree                 | Agree                       | Agree                       | Strongly disagree           |
| Agree                 | Agree                       | Agree                       | Agree                       |
| Agree                 | Agree                       | Strongly agree              | Agree                       |
| Disagree              | Disagree                    | Strongly agree              | Strongly agree              |
| I do not know         | Agree                       | Agree                       | Agree                       |
| Agree                 | Disagree                    | Agree                       | Strongly agree              |
| Agree                 | Agree                       | Disagree                    | Agree                       |
| Disagree              | Agree                       | Agree                       | Agree                       |
| Agree                 | Agree                       | Agree                       | Agree                       |
| Agree                 | Strongly agree              | Strongly agree              | Strongly agree              |
| Disagree              | I do not know               | Disagree                    | Agree                       |
| Strongly agree        | Agree                       | Strongly agree              | Strongly agree              |
| Agree                 | Disagree                    | Strongly disagree           | I do not know               |
| I do not know         | I do not know               | Disagree                    | Strongly disagree           |
| Strongly disagree     | I do not know               | Strongly disagree           | Strongly disagree           |
| Disagree              | Disagree                    | Agree                       | I do not know               |
| Agree                 | Agree                       | Agree                       | Agree                       |
| I do not know         | I do not know               | Strongly disagree           | Agree                       |

|                             |                             |                             |                             |
|-----------------------------|-----------------------------|-----------------------------|-----------------------------|
| One of the reasons for viol |
| Agree                       | Strongly agree              | Disagree                    | Agree                       |
| Agree                       | Strongly agree              | Agree                       | Agree                       |
| Strongly agree              | Strongly agree              | Strongly agree              | I do not know               |
| Strongly agree              | Strongly agree              | Strongly agree              | Strongly agree              |
| Strongly agree              | Disagree                    | Disagree                    | Agree                       |
| Strongly agree              | Strongly agree              | Disagree                    | Agree                       |
| Strongly agree              | Strongly disagree           | Strongly disagree           | Strongly agree              |
| Agree                       | Agree                       | Agree                       | Agree                       |
| Agree                       | Agree                       | Disagree                    | Agree                       |
| Strongly agree              | Disagree                    | Disagree                    | Agree                       |
| Agree                       | Agree                       | Disagree                    | I do not know               |
| I do not know               |
| Strongly agree              | Strongly agree              | Agree                       | Strongly agree              |
| I do not know               | Disagree                    | Disagree                    | Agree                       |
| Disagree                    | Agree                       | Disagree                    | Agree                       |
| I do not know               | Disagree                    | Disagree                    | Disagree                    |
| I do not know               | Agree                       | I do not know               | I do not know               |
| Agree                       | Agree                       | Disagree                    | Disagree                    |
| Agree                       | I do not know               | I do not know               | I do not know               |
| Agree                       | Agree                       | Disagree                    | Disagree                    |
| Agree                       | Strongly agree              | Disagree                    | Agree                       |
| Strongly agree              | Strongly agree              | Agree                       | Agree                       |
| Disagree                    | I do not know               | I do not know               | I do not know               |
| Strongly agree              | Strongly agree              | Strongly agree              | Strongly agree              |
| I do not know               | Disagree                    | Disagree                    | Disagree                    |
| Disagree                    | Disagree                    | I do not know               | Disagree                    |
| Disagree                    | I do not know               | Disagree                    | I do not know               |
| Disagree                    | Agree                       | Disagree                    | I do not know               |
| Agree                       | Agree                       | I do not know               | Agree                       |
| Strongly disagree           | Strongly disagree           | Strongly disagree           | Strongly disagree           |

|                             |                             |                             |                             |
|-----------------------------|-----------------------------|-----------------------------|-----------------------------|
| One of the reasons for viol |
| Agree                       | Strongly disagree           | Agree                       | Agree                       |
| Strongly agree              | Strongly agree              | Agree                       | Strongly agree              |
| Agree                       | Agree                       | Strongly agree              | Agree                       |
| Strongly agree              | Strongly agree              | Strongly agree              | Strongly agree              |
| Disagree                    | I do not know               | I do not know               | Disagree                    |
| Strongly agree              | Disagree                    | Agree                       | Disagree                    |
| Agree                       | Strongly agree              | Strongly agree              | Strongly agree              |
| Agree                       | Strongly agree              | Strongly agree              | Agree                       |
| Agree                       | I do not know               | Disagree                    | Agree                       |
| Disagree                    | Disagree                    | Agree                       | Strongly agree              |
| I do not know               | Disagree                    | Agree                       | I do not know               |
| I do not know               |
| I do not know               | Agree                       | Agree                       | Agree                       |
| Agree                       | Agree                       | I do not know               | Agree                       |
| Agree                       | Agree                       | Agree                       | Strongly agree              |
| I do not know               | Agree                       | I do not know               | Agree                       |
| Agree                       | I do not know               | I do not know               | Agree                       |
| Agree                       | I do not know               | Disagree                    | Agree                       |
| Agree                       | Agree                       | Agree                       | I do not know               |
| Agree                       | Strongly agree              | Disagree                    | Agree                       |
| Agree                       | I do not know               | Agree                       | Agree                       |
| Strongly agree              | Strongly agree              | Strongly agree              | Agree                       |
| Agree                       | Agree                       | Agree                       | Agree                       |
| Strongly agree              | Strongly agree              | Strongly agree              | Agree                       |
| Disagree                    | Disagree                    | I do not know               | Disagree                    |
| I do not know               | I do not know               | Disagree                    | Disagree                    |
| Agree                       | I do not know               | I do not know               | Disagree                    |
| Agree                       | Strongly disagree           | Strongly agree              | I do not know               |
| Agree                       | Strongly agree              | Agree                       | Disagree                    |
| Strongly disagree           | Strongly disagree           | Strongly disagree           | Strongly disagree           |

|                             |                             |                             |                             |
|-----------------------------|-----------------------------|-----------------------------|-----------------------------|
| One of the reasons for viol |
| Strongly agree              | Disagree                    | Agree                       | Disagree                    |
| Strongly agree              | I do not know               | Strongly agree              | Strongly agree              |
| Strongly agree              | Strongly agree              | Strongly agree              | Strongly agree              |
| Strongly agree              | Strongly agree              | Strongly agree              | Strongly agree              |
| I do not know               | I do not know               | Agree                       | I do not know               |
| Agree                       | Disagree                    | Strongly agree              | Agree                       |
| Strongly agree              | I do not know               | Strongly agree              | Agree                       |
| Agree                       | Agree                       | Agree                       | Strongly agree              |
| Agree                       | I do not know               | Agree                       | Disagree                    |
| Agree                       | Agree                       | Strongly agree              | Disagree                    |
| Disagree                    | Disagree                    | Disagree                    | Disagree                    |
| I do not know               |
| Agree                       | Disagree                    | Disagree                    | Disagree                    |
| Agree                       | Disagree                    | Disagree                    | Disagree                    |
| Agree                       | Disagree                    | Agree                       | Strongly agree              |
| Agree                       | Disagree                    | Agree                       | Disagree                    |
| Agree                       | I do not know               | Agree                       | Disagree                    |
| Agree                       | Disagree                    | Agree                       | I do not know               |
| I do not know               | Disagree                    | Agree                       | Agree                       |
| Agree                       | Disagree                    | Agree                       | Disagree                    |
| I do not know               | Strongly agree              | Agree                       | Strongly agree              |
| Agree                       | Strongly agree              | Strongly agree              | Strongly agree              |
| I do not know               | Agree                       | Agree                       | I do not know               |
| Strongly agree              | Agree                       | Strongly agree              | Strongly agree              |
| Disagree                    | Disagree                    | I do not know               | Disagree                    |
| Disagree                    | Strongly disagree           | Strongly disagree           | Strongly disagree           |
| Disagree                    | Disagree                    | Disagree                    | Disagree                    |
| Strongly disagree           | Strongly disagree           | I do not know               | Strongly disagree           |
| Agree                       | Agree                       | Agree                       | Strongly agree              |
| Strongly disagree           | Strongly disagree           | Strongly disagree           | I do not know               |



workers?
