# Supplementary material for: Breaching the Bridge: An Investigation into Doctor-Patient Miscommunication as a Significant Factor in the Violence against Healthcare Workers in Palestine
Source: Biomed Res Int. 2021 Jul 23;2021:9994872. doi: 10.1155/2021/9994872 (PMC8324345; doi:10.1155/2021/9994872)
Supplement: Supplementary Materials — All the utilized data to support the findings of the current study are included in the supplementary material. [file 9994872.f1.zip]

Archive with 3 entries (3 files):
- Pilot study.pdf
- Raw data Dr Nihad.pdf
- TOOL.docx
